# Supplementary material for: Socio-Demographic Factors Influencing Malaria Vaccine Acceptance for Under-Five Children in a Malaria-Endemic Region: A Community-Based Study in the Democratic Republic of Congo
Source: MDPI journal article supplement (doi:10.3390/vaccines12040380), 2024-04-02
Supplement: s1 [file s1]

## **Analysis of Vaccine Acceptability and Response to COVID-19, Malaria, and Cholera Vaccination in Bukavu**

### **Objective:**

The aim of this study is to evaluate the reactions of local populations to COVID-19 vaccination and to assess the acceptability of other available vaccines as well as those not yet present in our setting. Participation in this study is entirely voluntary, and you may withdraw at any time. Your responses will remain anonymous and confidential.

### **Ethical Approval:**

This study has been approved by the Ethics Committee of the Catholic University of Bukavu, responsible for protecting participant rights. The risks in this study are minimal.

### **Completion Time:**

Responding to this questionnaire will not take more than 5 minutes. If you have any questions related to this research, you can contact the principal investigator, Dr. Patrick Musole Bugeme, via email at [musolebugeme@gmail.com](mailto:musolebugeme@gmail.com) or by phone at +243990912809.

### **I voluntarily agree to answer this questionnaire.**

Yes,

No

- 1. What is your age (in years)? \***
- 2. What is your gender?**
  - Male
  - Female
- 3. What is your religion?**
  - Catholic Protestant (ECC, CEPAC, etc.)
  - Muslim
  - Evangelical Church
  - Other
- 4. Does your religion accept vaccination? \***
  - Yes
  - No
  - I don't know
- 5. In which commune of Bukavu do you reside? \***
  - Ibanda commune
  - Kadutu commune
  - Bagira commune,
  - Outside of Bukavu city (specify the region)
- 6. I am \***
  - Student (from Bachelor's to Master's level)
  - Healthcare worker
  - None of these options

**7. What is your field of study/faculty?**

Health sciences (medicine, nursing, laboratory, pharmacy, public health, etc.)  
Other faculties (Economics, Law, Sciences, Social Sciences, etc.)

**8. What is your level of education? \***

High school diploma  
Bachelor's degree

**9. Have you ever been vaccinated against COVID-19? \***

Yes  
No

**10. If yes, how many doses of the COVID-19 vaccine have you received?**

One  
Two  
More than two

**11. If no, why have you not received the COVID-19 vaccine? (Check all that apply)**

I suspected that the vaccine contained viruses like COVID-19, Ebola, and other microbes  
I feared the side effects  
I thought the vaccine was ineffective  
I thought the vaccine could have other harmful effects  
I didn't know where to get the vaccine I know nothing about the vaccine I refuse to answer this question

**12. If no (not yet vaccinated), I am then willing to receive the COVID-19 vaccine once available.**

Strongly agree  
Agree  
Neutral  
Disagree  
Strongly disagree

**13. If you have (or would have) children, would you be willing to vaccinate them against COVID-19? \***

Yes  
No  
I don't know

**14. In COVID-19 vaccination, what type of vaccine do you prefer? \***

mRNA-based  
DNA-based  
Attenuated virus-based  
Any of them None

**15. COVID-19 is a serious health threat. \***

Strongly agree  
Agree  
Neutral  
Disagree  
Strongly disagree

**16. COVID-19 can be prevented by vaccination. \***

Strongly agree  
Agree  
Neutral  
Disagree  
Strongly disagree

**17. The risks of COVID-19 disease are greater than the risks associated with its vaccine. \***

Strongly agree  
Agree  
Neutral  
Disagree  
Strongly disagree

**18. The COVID-19 vaccines available in our country are safe. \***

Strongly agree  
Agree  
Neutral  
Disagree  
Strongly disagree

**19. I believe that my government is capable of delivering the COVID-19 vaccine everywhere in my country, to everyone, and equally. \***

Strongly agree  
Agree  
Neutral  
Disagree  
Strongly disagree

**20. I have confidence in the science that has led to the development of COVID-19 vaccines. \***

Strongly agree  
Agree  
Neutral  
Disagree  
Strongly disagree

**21. I plan to get vaccinated (or revaccinated) against COVID-19 if my employer recommends it to me. \***

Strongly agree  
Agree  
Neutral  
Disagree  
Strongly disagree

**22. I plan to get vaccinated (or revaccinated) against COVID-19 if my doctor recommends it to me. \***

Strongly agree  
Agree

Neutral  
Disagree  
Strongly disagree

**23. I would vaccinate my children against COVID-19 as soon as the vaccine is available to them. \***

Strongly agree  
Agree  
Neutral  
Disagree  
Strongly disagree

**24. Employers should require COVID-19 vaccination for all their employees. \***

Strongly agree  
Agree  
Neutral  
Disagree  
Strongly disagree

**25. The government should mandate COVID-19 vaccination for the population. \***

Strongly agree  
Agree  
Neutral  
Disagree  
Strongly disagree

**26. Universities should require COVID-19 vaccination for all their students. \***

Strongly agree  
Agree  
Neutral  
Disagree  
Strongly disagree

**27. COVID-19 vaccination should be required for students. \***

Strongly agree  
Agree  
Neutral  
Disagree  
Strongly disagree

**28. Proof of vaccination should be required for activities in enclosed spaces such as party venues, cinemas, stadiums, etc. \***

Strongly agree  
Agree  
Neutral  
Disagree  
Strongly disagree

**29. Proof of vaccination should be required for all international travel. \***

Strongly agree  
Agree

Neutral  
Disagree  
Strongly disagree

**30. Have you or anyone else in your household experienced a decrease in income due to the COVID-19 pandemic? \***

Yes, a significant decrease  
Yes, a moderate decrease  
No

**31. Have you or anyone else in your family suffered from COVID-19? \***

Yes  
No

**32. Have you lost a family member due to COVID-19? \***

Yes  
No

**33. How often in the past week have you felt nervous, anxious, or on edge? \***

Rarely or almost never (less than one day)  
Sometimes or a little of the time (1-2 days)  
Occasionally (3-4 days)  
Most of the time (5-7 days)

**34. In the past week, have you felt down, depressed, or hopeless? \***

Rarely or almost never (less than one day)  
Sometimes or a little of the time (1-2 days)  
Occasionally (3-4 days)  
Most of the time (5-7 days)

**35. Do you believe that the central government will effectively manage various unexpected health threats in our country, including the COVID-19 pandemic? \***

Yes  
No

**36. Do you believe that the local government will effectively manage various unexpected health threats in our country, including the COVID-19 pandemic? \***

Yes  
No

**37. Have you locally seen an information campaign about COVID-19 vaccination? \***

Yes  
No  
I am not sure

**38. If yes, where did you come across this campaign? (Check all that apply)**

Online –  
on Facebook,  
WhatsApp,  
and Twitter

I attended an in-person meeting/event

I was visited at home by a COVID-19 vaccination awareness advocate

I heard about it through an announcement about COVID-19 vaccination

I saw it on a poster about COVID-19 vaccination Other:

**39. Have you ever been vaccinated against malaria? \***

Yes

No

**40. If no, would you be willing to receive the malaria vaccine once available?**

Yes

No

I don't know

**41. If you have children, would you be willing to have them vaccinated against malaria?**

Yes

No

I don't know

**42. Have you ever been vaccinated against HIV? \***

Yes

No

**43. If not, would you be willing to receive the HIV vaccine once available?**

Yes

No

I don't know

**44. If you have children, would you be willing to have them vaccinated against HIV?**

Yes

No

I don't know

**45. Have you ever been vaccinated against tuberculosis? \***

Yes

No

**46. If not, would you be willing to receive this vaccine once available?**

Yes

No

I don't know

**47. If you have children, would you be willing to have them vaccinated against tuberculosis?**

Yes

No

I don't know

**48. Have you ever been vaccinated against influenza (flu virus)? \***

Yes

No

**49. If not, would you be willing to receive this vaccine once available?**

Yes

No

I don't know

**50. If you have children, would you be willing to have them vaccinated against the influenza virus?**

Yes

No

I don't know

**51. Have you ever been vaccinated against cholera? \***

Yes

No

**52. If not, would you be willing to receive this vaccine once available?**

Yes

No

I don't know

**53. If you have children, would you be willing to have them vaccinated against cholera?**

Yes

No

I don't know

**54. Have you ever been vaccinated against HPV (human papillomavirus)? \***

Yes

No

**55. If not, would you be willing to receive the HPV vaccine once available?**

Yes

No

I don't know

**56. If you have children, would you be willing to have them vaccinated against HPV?**

Yes

No

I don't know

**57. Have you ever been vaccinated against hepatitis B virus?**

Yes

No

**58. If not, would you be willing to receive the hepatitis B virus vaccine once available?**

Yes

No

I don't know

**59. If you have children, would you be willing to have them vaccinated against the hepatitis B virus?**

Yes

No

I don't know

Thank you for your cooperation! You have reached the end of the questionnaire, click "Send"  
The research team expresses deep gratitude to you for taking the time and bearing the cost associated with completing this form.



## **Analyse de l'acceptabilité des vaccins et de la réponse à la vaccination contre la COVID-19, la Malaria et le Cholera à Bukavu**

L'objectif de cette étude est d'évaluer les réactions des populations locales face à la vaccination contre la Covid-19 et faire un état de lieu sur l'acceptabilité d'autres vaccins disponibles et ceux non encore présents dans notre milieu. La participation dans cette étude est totalement volontaire et vous pouvez vous retirer à n'importe quel moment. Vos réponses demeureront anonymes et confidentielles.

Cette étude a été approuvée par le Comité d'éthique de l'Université Catholique de Bukavu, en charge de la protection des droits du participant. Les risques dans cette étude sont quasi-minimaux.

Répondre à ce questionnaire ne va pas vous prendre plus de 5 minutes. Si vous avez des questions en rapport à cette recherche, vous pouvez contacter l'investigateur principal, Dr. Patrick Musole Bugeme via: musolebugeme@gmail.com , +243990912809

### **J'accepte volontairement de répondre à ce questionnaire.**

Yes,

No

#### **1. Quel est votre âge (en année)? \***

#### **2. Quel est votre genre ?**

Masculin

Féminin

#### **3. Vous êtes de quelle religion ?**

Catholique

Protestant (ECC, CEPAC,...)

Musulmane

Eglise de reveil

Autres

#### **4. Est ce que votre religion accepte la vaccination? \***

Oui

Non

Je ne sais pas

#### **5. Dans quelle commune de Bukavu habitez-vous? \***

commune d'Ibanda

Commune de Kadutu

Bukavu, Commune de Bagira

Hors de la ville de Bukavu

Si, hors de la ville de Bukavu, spécifiez la région dans la quelle vous habitez  
province, ville, cité, territoire, chefferie,....

**6. Je suis \***

Etudiant (de Bacc+1 à Bacc+5)

Travailleur dans le domaine de la santé

Aucune de ces deux options

**7. De quelle faculté/domaine d'étude êtes-vous?**

Sciences de la santé (médecine, sciences infirmières, laboratoire, pharmacie, Santé publique,...

Autres facultés que science de la santé (Economie, Droit, faculté des sciences, Sciences sociales,... )

**8. Quel est votre niveau d'étude ? \***

Diplomé d'Etat

Gradué

**9. Avez-vous déjà été vacciné(e) contre la COVID-19? \***

Oui

Non

**10. Si oui, combien de dose de vaccin contre la COVID-19 avez vous déjà reçu?**

Une

Deux

Plus de deux

**11. Si non, selon vous, pourquoi n'avez-vous pas reçu le vaccin contre la COVID-19 ? (cochez toutes les cases qui vous correspondent)**

Je soupçonnais que le vaccin contenait des virus comme le Covid-19, Ebola et d'autres microbes

Je craignais les effets secondaires

Je pensais que le vaccin était inefficace

Je pensais que le vaccin pouvait avoir d'autres effets néfastes

Je ne savais où me procurer ce vaccin

Je ne sais rien du vaccin

Je refuse de répondre à cette question

**12. Si non (non encore vacciné), Je suis alors prêt(e) à recevoir le vaccin contre la COVID-19 une fois disponible?**

Tout à fait d'accord  
Un peu d'accord  
Je ne suis pas sûr/Je n'ai pas d'opinion  
Un peu en désaccord  
Pas du tout d'accord

**13. Si vous avez (si vous auriez) des enfants, seriez-vous prêt à les faire vacciner contre la COVID-19? \***

Oui  
Non  
Je ne sais pas

**14. Dans la vaccination contre la Covid-19, quel type de vaccin préférez-vous ? \***

À base d'ARNm  
À base d'ADN  
À base des germes atténués  
Tous me conviennent  
Aucun

**15. La COVID-19 est une menace sanitaire sérieuse \***

Tout à fait d'accord  
Un peu d'accord  
Je ne suis pas sûr/Je n'ai pas d'opinion  
Un peu en désaccord  
Pas du tout d'accord

**16. La COVID-19 peut être prévenue par la vaccination \***

Tout à fait d'accord  
Un peu d'accord  
Je ne suis pas sûr/Je n'ai pas d'opinion  
Un peu en désaccord  
Pas du tout d'accord

**17. Les risques de la maladie à COVID-19 sont plus grands que les risques liés à son vaccin \***

Tout à fait d'accord  
Un peu d'accord  
Je ne suis pas sûr/Je n'ai pas d'opinion  
Un peu en désaccord  
Pas du tout d'accord

**18. Les vaccins contre COVID-19 disponibles chez nous sont sûrs \***

Tout à fait d'accord  
Un peu d'accord

Je ne suis pas sûr/Je n'ai pas d'opinion  
Un peu en désaccord  
Pas du tout d'accord

**19. Je crois que mon gouvernement est capable de délivrer le vaccin contre la COVID-19 partout dans mon pays, à tout le monde et de manière égale \***

Tout à fait d'accord  
Un peu d'accord  
Je ne suis pas sûr/Je n'ai pas d'opinion  
Un peu en désaccord  
Pas du tout d'accord

**20. J'ai confiance en la science qui a donné lieu aux vaccins contre la COVID-19. \***

Tout à fait d'accord  
Un peu d'accord  
Je ne suis pas sûr/Je n'ai pas d'opinion  
Un peu en désaccord  
Pas du tout d'accord

**21. Je compte me faire vacciner (ou revacciner) contre la COVID-19 si mon employeur me le recommande \***

Tout à fait d'accord  
Un peu d'accord  
Je ne suis pas sûr /Je n'ai pas d'opinion  
Un peu en désaccord  
Pas du tout d'accord

**22. Je compte me faire vacciner (ou revacciner) contre la COVID-19 si mon médecin me le recommande \***

Tout à fait d'accord  
Un peu d'accord  
Je ne suis pas sûr /Je n'ai pas d'opinion  
Un peu en désaccord  
Pas du tout d'accord

**23. Je ferais vacciner mes enfants contre la COVID-19 dès que ce vaccin sera mis à leur disposition**

Tout à fait d'accord  
Un peu d'accord  
Je ne suis pas sûr /Je n'ai pas d'opinion  
Un peu en désaccord  
Pas du tout d'accord

**24. Les employeurs devraient exiger la vaccination contre COVID-19 à tous leurs employés \***

Tout à fait d'accord  
Un peu d'accord  
Je ne suis pas sûr /Je n'ai pas d'opinion  
Un peu en désaccord  
Pas du tout d'accord

**25. Le gouvernement devrait exiger à sa population la vaccination contre COVID-19 \***

Tout à fait d'accord  
Un peu d'accord  
Je ne suis pas sûr /Je n'ai pas d'opinion  
Un peu en désaccord  
Pas du tout d'accord

**26. Les universités devraient exiger la vaccination contre COVID-19 à tous leurs étudiants \***

Tout à fait d'accord  
Un peu d'accord  
Je ne suis pas sûr /Je n'ai pas d'opinion  
Un peu en désaccord  
Pas du tout d'accord

**27. La vaccination contre COVID-19 devrait être exigée aux élèves \***

Tout à fait d'accord  
Un peu d'accord  
Je ne suis pas sûr /Je n'ai pas d'opinion  
Un peu en désaccord  
Pas du tout d'accord

**28. Une preuve de vaccination devrait être exigée pour les activités dans les endroits clos comme dans les salles de fête, salles de cinema, les stades... \***

Tout à fait d'accord  
Un peu d'accord  
Je ne suis pas sûr /Je n'ai pas d'opinion  
Un peu en désaccord  
Pas du tout d'accord

**29. Une preuve de vaccination devrait être exigée pour tous les voyages à l'étranger \***

Tout à fait d'accord

Un peu d'accord

Je ne suis pas sûr /Je n'ai pas d'opinion

Un peu en désaccord

Pas du tout d'accord

**30. Avez-vous ou quelqu'un d'autre de votre ménage a-t'il démontré une baisse de vos (ses) revenus suite à la pandémie à COVID-19 ? \***

Oui, une baisse grave

Oui, une baisse modérée

Non

**31. Avez-vous ou quelqu'un d'autre dans votre famille souffert de la maladie à COVID-19 ? \***

Oui

Non

**32. Avez-vous perdu un membre de votre famille suite à la maladie à COVID-19 ?**

Oui

Non

**33. Durant la dernière semaine, combien de fois est-ce que vous vous êtes senti nerveux, anxieux ou sur vos nerfs ? \***

Rarement ou Presque pas (moins d'un jour) ;

Quelques fois ou un peu de temps (1-2 jours) ;

Occasionnellement (3-4 jours);

La plupart des temps (5-7 jours)

**34. Durant la semaine passée, vous êtes-vous écroulé, senti dépressif(ve) ou sans espoir ? \***

Rarement ou Presque pas (moins d'un jour) ;

Quelques fois ou un peu de temps (1-2 jours) ;

Occasionnellement (3-4 jours);

La plupart des temps (5-7 jours)

**35. Croyez-vous que le gouvernement central va bien gérer les différentes menaces sanitaires inattendues dans notre pays, incluant la pandémie à COVID-19 ? \***

Oui  
Non

**36. Croyez-vous que le gouvernement local va bien gérer les différentes menaces sanitaires inattendues dans notre pays, incluant la pandémie à COVID-19 ? \***

Oui  
Non

**37. Avez-vous déjà vu localement une campagne d'information sur la vaccination contre la COVID-19 ? \***

Oui  
Non  
Je ne suis pas sûr

**38. Si oui, où avez-vous découvert cette campagne ? (Cochez toutes les réponses qui vous correspondent)**

En ligne-sur facebook, Whatsapp et Twitter  
J'avais assisté à une réunion/ rencontre en présentiel  
J'avais été visité chez moi par un sensibilisateur de la vaccination contre la COVID-19  
J'ai entendu cela via une annonce au sujet de la vaccination contre la COVID-19  
J'ai vu cela via une affiche au sujet de la vaccination contre la COVID-19  
Other:

**39. Avez-vous déjà été vacciné contre la malaria \***

Oui  
Non

**40. Si non, seriez-vous prêt à recevoir le vaccin contre la malaria dès que disponible?**

Oui  
Non  
Je ne sais pas

**41. Si vous avez des enfants, seriez-vous prêt à les faire vacciner contre la malaria?**

Oui  
Non  
Je ne sais pas

**42. Avez-vous déjà été vacciné contre le VIH \***

Oui

Non

**43. Si non, seriez-vous prêt à recevoir le vaccin contre le VIH dès que disponible?**

Oui

Non

Je ne sais pas

**44. Si vous avez des enfants, seriez-vous prêt à les faire vacciner contre le VIH?**

Oui

Non

Je ne sais pas

**45. Avez-vous déjà été vacciné contre la tuberculose \***

Oui

Non

**46. Si non, seriez-vous prêt à recevoir ce vaccin une fois disponible?**

Oui

Non

Je ne sais pas

**47. Si vous avez des enfants, seriez-vous prêt à les faire vacciner contre la tuberculose?**

Oui

Non

Je ne sais pas

**48. Avez-vous déjà été vacciné contre le virus influenza (virus de la grippe) \***

Oui

Non

**49. Si non, seriez-vous prêt à recevoir ce vaccin dès que disponible?**

Oui

Non

Je ne sais pas

**50. Si vous avez des enfants, seriez-vous prêt à les faire vacciner contre le virus influenza?**



Oui  
Non  
Je ne sais pas

**51. Avez-vous déjà été vacciné contre le choléra \***

Oui  
Non

**52. Si non, seriez-vous prêt à recevoir ce vaccin dès que disponible?**

Oui  
Non  
Je ne sais pas

**53. Si vous avez des enfants, seriez-vous prêt à les faire vacciner contre le choléra?**

Oui  
Non  
Je ne sais pas

**54. Avez-vous déjà été vacciné contre le HPV (virus du papillome humain) \***

Oui  
Non

Si non, seriez-vous prêt à recevoir le vaccin contre le HPV dès que disponible?

Oui  
Non  
Je ne sais pas

**55. Si vous avez des enfants, seriez-vous prêt à les faire vacciner contre le HPV?**

Oui  
Non  
Je ne sais pas

**56. Avez-vous déjà été vacciné contre le virus de hépatite B \***

Oui  
Non

**57. Si non, seriez-vous prêt à recevoir le vaccin contre le virus de l'hépatite B dès que disponible?**

Oui  
Non  
Je ne sais pas

**58. Si vous avez des enfants, seriez-vous prêt à les faire vacciner contre le virus de l'hépatite B?**

Oui

Non

Je ne sais pas

Merci pour votre coopération! Vous êtes à la fin du questionnaire, cliquez sur "Envoyer"  
L'équipe de recherche exprime une profonde gratitude envers votre personne pour avoir pris le temps et supporté le coût lié à la complétion de ce formulaire
